# Supplementary material
Source: publisher figshare collection journal article supplement (https://rs.figshare.com/ndownloader/files/16851584)
Supplement: Supplementary file 1 [file 16851584]

species	id	mass	hard	stiff
bredeni	54	1.71	0.67	11.9
bredeni	25	1.96	0.74	34.85
bredeni	8	2.17	0.15	1.58
bredeni	4	2.44	0.37	14.44
bredeni	55	1.58	0.72	13.6
bredeni	31	1.15	1.44	17.22
bredeni	26	2.67	0.4	7.14
bredeni	18	1.85	0.57	11.68
empusa	6	13.5	0.25	6.94
empusa	1	9.16	0.86	20.03
empusa	2	11.23	0.33	3.55
empusa	3	7.61	0.76	44.61
empusa	4	8.14	0.59	29.71
empusa	5	9.54	0.44	12.44
empusa	8	22.99	0.59	3.65
empusa	9	23.56	0.7	40.59
